# Supplementary material
Source: publisher figshare collection journal article supplement (https://acs.figshare.com/ndownloader/files/5324326)
Supplement: Supplementary file 1 [file 5324326]

##############################################################################
###      FullProf-generated CIF output file  (version: May 2011)           ###
###      Template of CIF submission form for structure report              ###
##############################################################################
 
# This file has been generated using FullProf.2k taking one example of 
# structure report provided by Acta Cryst. It is given as a 'template' with 
# filled structural items. Many other items are left unfilled and it is the  
# responsibility of the user to properly fill or suppress them. In principle 
# all question marks '?' should be replaced by the appropriate text or 
# numerical value depending on the kind of CIF item. 
# See the document: cif_core.dic (URL: http://www.iucr.org) for details. 
 
# Please notify any error or suggestion to: 
#           Juan Rodriguez-Carvajal (jrc@ill.eu)
# Improvements will be progressively added as needed.
 
#=============================================================================
 data_global
#=============================================================================
 
# PROCESSING SUMMARY (IUCr Office Use Only)
 
_journal_data_validation_number      ?
 
_journal_date_recd_electronic        ?
_journal_date_to_coeditor            ?
_journal_date_from_coeditor          ?
_journal_date_accepted               ?
_journal_date_printers_first         ?
_journal_date_printers_final         ?
_journal_date_proofs_out             ?
_journal_date_proofs_in              ?
_journal_coeditor_name               ?
_journal_coeditor_code               ?
_journal_coeditor_notes
; ?
;
_journal_techeditor_code             ?
_journal_techeditor_notes
; ?
;
_journal_coden_ASTM                  ?
_journal_name_full                   ?
_journal_year                        ?
_journal_volume                      ?
_journal_issue                       ?
_journal_page_first                  ?
_journal_page_last                   ?
_journal_paper_category              ?
_journal_suppl_publ_number           ?
_journal_suppl_publ_pages            ?
 
#=============================================================================
 
# 1. SUBMISSION DETAILS
 
_publ_contact_author_name            'Dronskowski, Richard'  
_publ_contact_author_address            # Address of author for correspondence
; ?
;
_publ_contact_author_email           drons@hal9000.ac.rwth-aachen.de
_publ_contact_author_fax             0049(0)2418092642
_publ_contact_author_phone           0049(0)2418093642
 
_publ_contact_letter
; ?
;
 
_publ_requested_journal              ?
_publ_requested_coeditor_name        ?
_publ_requested_category             ?   # Acta C: one of CI/CM/CO/FI/FM/FO
 
 
# Definition of non standard CIF items (Reliability indices used in FULLPROF) 
 
loop_ 
_publ_manuscript_incl_extra_item
_publ_manuscript_incl_extra_info
_publ_manuscript_incl_extra_defn
#      Name                               Explanation                 Standard?
#     ------                              -----------                 ---------
 '_pd_proc_ls_prof_cR_factor'    'Prof. R-factor CORRECTED for background'   no
 '_pd_proc_ls_prof_cwR_factor'   'wProf.R-factor CORRECTED for background'   no
 '_pd_proc_ls_prof_cwR_expected' 'wProf.Expected CORRECTED for background'   no
 '_pd_proc_ls_prof_chi2'         'Chi-square for all considered points'      no
 '_pd_proc_ls_prof_echi2'        'Chi-2 for points with Bragg contribution'  no
#=============================================================================
 
# 3. TITLE AND AUTHOR LIST
 
_publ_section_title
; 'Ammonothermal synthesis, crystal structure and properties of the ytterbium(II) and ytterbium(III) amides and the first two rare-earth metal guanidinates, YbC(NH)3 and Yb(CN3H4)3'
;
_publ_section_title_footnote
;
;
 
# The loop structure below should contain the names and addresses of all 
# authors, in the required order of publication. Repeat as necessary.
 
loop_
    _publ_author_name
    _publ_author_address
'G\"orne, Arno L.'
'George, Janine'
'van Leusen, Jan'
'D\"uck, Gerald'
'Jacobs, Philipp'
'Muniraju, Naveen Kumar Chogondahalli'
'Dronskowski, Richard'
;
'Institute of Inorganic Chemistry, RWTH Aachen University, Landoltweg 1, 52056 Aachen, Germany'
'J�lich Centre for Neutron Science (JCNS), Forschungszentrum J�lich GmbH, Outstation at SNS, Oak Ridge National Laboratory, Oak Ridge, Tennessee 37831, USA, Chemical and Engineering Materials Division, Oak Ridge National Laboratory, Oak Ridge, Tennessee 37831, USA'
;
 
#=============================================================================
 
# 4. TEXT
 
_publ_section_synopsis
;  ?
;
_publ_section_abstract
; ?
;          
_publ_section_comment
; ?
;
_publ_section_exptl_prep      # Details of the preparation of the sample(s)
                              # should be given here. 
; ?
;
_publ_section_exptl_refinement
; ?
;
_publ_section_references
; ?
;
_publ_section_figure_captions
; ?
;
_publ_section_acknowledgements
; ?
;
 
#=============================================================================
 
#=============================================================================
# If more than one structure is reported, the remaining sections should be 
# completed per structure. For each data set, replace the '?' in the
# data_? line below by a unique identifier.
 
data_Yb(CN3H4)3_300K                              
 
#=============================================================================
 
# 5. CHEMICAL DATA
 
_chemical_name_systematic
; ?
;
_chemical_name_common             Ytterbium(III)guanidinate
_chemical_formula_moiety          'Yb C3 N9 H12'
_chemical_formula_structural      'Yb (C N3 H4)3'
_chemical_formula_analytical      ?
_chemical_formula_iupac           'Yb (C N3 H4)3'
_chemical_formula_sum             'C3 H12 N9 Yb'
_chemical_formula_weight          347.23
_chemical_melting_point           ?
_chemical_compound_source         ?       # for minerals and 
                                          # natural products
 
loop_
    _atom_type_symbol               
    _atom_type_scat_length_neutron      
    _atom_type_scat_source          
Yb     1.24300 V.F._Sears_Neutron_News_3_26_(1992)
C      0.66460 V.F._Sears_Neutron_News_3_26_(1992)
N      0.93600 V.F._Sears_Neutron_News_3_26_(1992)
H     -0.37390 V.F._Sears_Neutron_News_3_26_(1992)
 
#=============================================================================
 
# 6. POWDER SPECIMEN AND CRYSTAL DATA
 
_symmetry_cell_setting                Cubic
_symmetry_space_group_name_H-M       'P n -3'
_symmetry_space_group_name_Hall      '-P 2ab 2bc 3'
 
loop_
    _symmetry_equiv_pos_as_xyz   #<--must include 'x,y,z'
'x,y,z'
'x,-y+1/2,-z+1/2'
'-x+1/2,y,-z+1/2'
'-x+1/2,-y+1/2,z'
'y,z,x'
'-y+1/2,-z+1/2,x'
'y,-z+1/2,-x+1/2'
'-y+1/2,z,-x+1/2'
'z,x,y'
'-z+1/2,x,-y+1/2'
'-z+1/2,-x+1/2,y'
'z,-x+1/2,-y+1/2'
'-x,-y,-z'
'-x,y+1/2,z+1/2'
'x+1/2,-y,z+1/2'
'x+1/2,y+1/2,-z'
'-y,-z,-x'
'y+1/2,z+1/2,-x'
'-y,z+1/2,x+1/2'
'y+1/2,-z,x+1/2'
'-z,-x,-y'
'z+1/2,-x,y+1/2'
'z+1/2,x+1/2,-y'
'-z,x+1/2,y+1/2'
 
_cell_length_a                       13.58159(5)
_cell_length_b                       13.58159(5)
_cell_length_c                       13.58159(5)
_cell_angle_alpha                    90.00000
_cell_angle_beta                     90.00000
_cell_angle_gamma                    90.00000
_cell_volume                         2505.252(15)
_cell_formula_units_Z                8
_cell_measurement_temperature        300
_cell_special_details
; ?
;
# The next three fields give the specimen dimensions in mm.  The equatorial
# plane contains the incident and diffracted beam.
 
_pd_spec_size_axial               50      # perpendicular to 
                                          # equatorial plane
_pd_spec_size_equat                3      # parallel to 
                                          # scattering vector
                                          # in transmission
_pd_spec_size_thick                3      # parallel to 
                                          # scattering vector
                                          # in reflection
 
# The next five fields are character fields that describe the specimen.
 
_pd_spec_mounting                         # This field should be
                                          # used to give details of the 
                                          # container.
; ?
;
_pd_spec_mount_mode      transmission     # options are 'reflection'
                                          # or 'transmission'
_pd_spec_shape             cylinder       # options are 'cylinder' 
                                          # 'flat_sheet' or 'irregular'
_pd_char_particle_morphology      ?
_pd_char_colour           colorless       # use ICDD colour descriptions
 
# The following three fields describe the preparation of the specimen.
# The cooling rate is in K/min.  The pressure at which the sample was 
# prepared is in kPa.  The temperature of preparation is in K.        
 
_pd_prep_cool_rate                ?
_pd_prep_pressure                 3310
_pd_prep_temperature              343
 
# The next four fields are normally only needed for transmission experiments.
 
_exptl_absorpt_coefficient_mu        ?
_exptl_absorpt_correction_type       ?
_exptl_absorpt_process_details       ?
_exptl_absorpt_correction_T_min      ?
_exptl_absorpt_correction_T_max      ?
 
#=============================================================================
 
# 7. EXPERIMENTAL DATA
 
_exptl_special_details
; ?
;
 
# The following item is used to identify the equipment used to record 
# the powder pattern when the diffractogram was measured at a laboratory 
# other than the authors' home institution, e.g. when neutron or synchrotron
# radiation is used.
 
_pd_instr_location
; ORNL
;
_pd_calibration_special_details           # description of the method used
                                          # to calibrate the instrument
; ?
;
 
_diffrn_ambient_temperature          300
_diffrn_source           'spallation source'
_diffrn_source_target     Hg  # Put here the type of target 
_diffrn_radiation_type   'TOF Neutron Diffraction' 
_diffrn_radiation_wavelength  	     2.665 # center wavelength of bank 4 (TOF)
_diffrn_source_type       'POWGEN, SNS'  # Put here the diffractometer and site 
 
_diffrn_radiation_monochromator      ?
_diffrn_measurement_device_type      POWGEN
_diffrn_measurement_method           ?
_diffrn_detector_area_resol_mean     ? # Not in version 2.0.1
_diffrn_detector                     ?
_diffrn_detector_type                ? # make or model of detector
_pd_meas_scan_method      tof   # options are 'step', 'cont',
                              # 'tof', 'fixed' or
                              # 'disp' (= dispersive)
_pd_meas_special_details
;  ?
;
 
#  The following four items give details of the measured (not processed)
#  powder pattern.  Angles are in degrees.
 
_pd_meas_number_of_points         2575
_pd_meas_2theta_range_min         26209.95508
_pd_meas_2theta_range_max         205294.07812
_pd_meas_2theta_range_inc         69.601280
 
# The following three items are used for time-of-flight measurements only.
 
_pd_instr_dist_src/spec           6000
_pd_instr_dist_spec/detc          250-450
_pd_meas_2theta_fixed             90.0000

_cell_measurement_reflns_used 		146
_cell_measurement_theta_min 		20
_cell_measurement_theta_max 		150
 
#=============================================================================
 
# 8. REFINEMENT DATA
 
_refine_special_details
; ?
;
 
# Use the next field to give any special details about the fitting of the
# powder pattern.
 
_pd_proc_ls_special_details
; ?
;
 
# The next three items are given as text.
 
_pd_proc_ls_profile_function      ?
_pd_proc_ls_background_function   ?
_pd_proc_ls_pref_orient_corr
; ?
;
 
#  The following profile R-factors are NOT CORRECTED for background
#  The sum is extended to all non-excluded points.
#  These are the current CIF standard
 
_pd_proc_ls_prof_R_factor                2.6468
_pd_proc_ls_prof_wR_factor               1.6672
_pd_proc_ls_prof_wR_expected            34.1793
_refine_ls_goodness_of_fit_all 		 1.64
 
#  The following profile R-factors are CORRECTED for background
#  The sum is extended to all non-excluded points.
#  These items are not in the current CIF standard, but are defined above
 
_pd_proc_ls_prof_cR_factor               39.6043
_pd_proc_ls_prof_cwR_factor              15.1848
_pd_proc_ls_prof_cwR_expected           311.3059
 
#  The following items are not in the CIF standard, but are defined above
 
_pd_proc_ls_prof_chi2                 0.0024
_pd_proc_ls_prof_echi2                0.0025
 
#  Items related to LS refinement
 
_refine_ls_R_I_factor                 6.1821
_refine_ls_number_reflns                   431
_refine_ls_number_parameters                59
_refine_ls_number_restraints                 4
 
_pd_block_diffractogram_id        ?  # The id used for the block containing
                                     # the powder pattern profile (section 11)
 
# Give appropriate details in the next two text fields.
 
_pd_proc_info_excluded_regions    ?
_pd_proc_info_data_reduction      ?
 
# The following items are used to identify the programs used.
 
_computing_data_collection           ?
_computing_structure_solution        ?
_computing_structure_refinement      FULLPROF
_computing_molecular_graphics        ?
_computing_publication_material      ?
 
#=============================================================================
 
# 9. ATOMIC COORDINATES AND DISPLACEMENT PARAMETERS
 
loop_
    _atom_site_label
    _atom_site_fract_x
    _atom_site_fract_y
    _atom_site_fract_z
    _atom_site_U_iso_or_equiv
    _atom_site_occupancy
    _atom_site_adp_type              # Not in version 2.0.1
    _atom_site_type_symbol
 Yb1  0.00000  0.00000  0.00000  0.0141(3)  1.00000 Uani Yb    
 Yb2  0.50000  0.50000  0.50000  0.0141(3)  1.00000 Uani Yb    
 C1  0.5279(4)  0.4952(5) 0.2519(10)  0.023(3)  1.00000 Uani C     
 N1  0.5311(7) 0.4549(5) 0.1620(6)  0.031(4)  1.00000 Uani N     
 N2  0.5303(6)  0.4522(5) 0.3381(7)  0.032(4)  1.00000 Uani N     
 N3  0.5165(7)  0.5950(4) 0.2511(6)  0.092(6)  1.00000 Uani N     
 H1  0.5520(19)  0.3822(9) 0.1669(19)  0.045(6)  1.00000 Uiso H     
 H2  0.5264(18)  0.3770(7) 0.3289(16)  0.056(8)  1.00000 Uiso H     
 H3  0.5424(15)  0.6304(13) 0.1887(10)  0.055(5)  1.00000 Uiso H     
 H4  0.4960(16)  0.6280(13) 0.3155(10)  0.047(4)  1.00000 Uiso H     
 
loop_
    _atom_site_aniso_label 
    _atom_site_aniso_U_11  
    _atom_site_aniso_U_22  
    _atom_site_aniso_U_33  
    _atom_site_aniso_U_12  
    _atom_site_aniso_U_13  
    _atom_site_aniso_U_23  
    _atom_site_aniso_type_symbol
 Yb1  0.0141(3)  0.0141(3)  0.0141(3) -0.001(4) -0.001(4) -0.001(4)  H     
 Yb2  0.0141(3)  0.0141(3)  0.0141(3) -0.001(4)  0.001(4) -0.001(4)  H     
 C1  0.018(3)  0.013(2)  0.037(4)  0.007(5)  0.013(3)  0.020(5)  H     
 N1  0.046(5)  0.035(4)  0.013(3) -0.013(4)  0.009(4) -0.003(3)  H     
 N2  0.033(4)  0.004(3)  0.059(6) -0.008(3) -0.002(5)  0.006(4)  H     
 N3  0.036(3)  0.024(3)  0.215(10)  0.004(7)  0.013(5)  0.018(12)  H     
 
# Note: if the displacement parameters were refined anisotropically
# the U matrices should be given as for single-crystal studies.
 
#=============================================================================
 
# 10. DISTANCES AND ANGLES / MOLECULAR GEOMETRY 
 
_geom_special_details                ?
 
loop_
    _geom_bond_atom_site_label_1  
    _geom_bond_atom_site_label_2  
    _geom_bond_site_symmetry_1    
    _geom_bond_site_symmetry_2    
    _geom_bond_distance           
    _geom_bond_publ_flag          
Yb2 N2 . . 2.329(9) ?
C1 N1 . . 1.34(2) ?
C1 N2 . . 1.31(2) ?
C1 N3 . . 1.364(9) ?
N1 H1 . . 1.03(2) ?
N2 H2 . . 1.03(1) ?
N3 H3 . . 1.04(2) ?
N3 H4 . . 1.02(1) ?
 
loop_
    _geom_contact_atom_site_label_1 
    _geom_contact_atom_site_label_2 
    _geom_contact_distance          
    _geom_contact_site_symmetry_1   
    _geom_contact_site_symmetry_2   
    _geom_contact_publ_flag         
    ?   ?   ?   ?   ?   ?
 
loop_
_geom_angle_atom_site_label_1 
_geom_angle_atom_site_label_2 
_geom_angle_atom_site_label_3 
_geom_angle_site_symmetry_1   
_geom_angle_site_symmetry_2   
_geom_angle_site_symmetry_3   
_geom_angle                   
_geom_angle_publ_flag         
N1 C1 N2 . . . 129(1) ?
N1 C1 N3 . . . 113.7(6) ?
N2 C1 N3 . . . 117.0(7) ?
 
loop_
_geom_torsion_atom_site_label_1 
_geom_torsion_atom_site_label_2 
_geom_torsion_atom_site_label_3 
_geom_torsion_atom_site_label_4 
_geom_torsion_site_symmetry_1   
_geom_torsion_site_symmetry_2   
_geom_torsion_site_symmetry_3   
_geom_torsion_site_symmetry_4   
_geom_torsion                   
_geom_torsion_publ_flag         
N1 C1 N2 N3 . . . . -177(2) ?
 
loop_
_geom_hbond_atom_site_label_D 
_geom_hbond_atom_site_label_H 
_geom_hbond_atom_site_label_A 
_geom_hbond_site_symmetry_D   
_geom_hbond_site_symmetry_H   
_geom_hbond_site_symmetry_A   
_geom_hbond_distance_DH       
_geom_hbond_distance_HA       
_geom_hbond_distance_DA       
_geom_hbond_angle_DHA         
_geom_hbond_publ_flag         
?   ?   ?   ?   ?   ?   ?   ?   ?   ?   ?
 
#=============================================================================
 
#=============================================================================
# Additional structures (last six sections and associated data_? identifiers) 
# may be added at this point.                                                 
#=============================================================================
 
# The following lines are used to test the character set of files sent by     
# network email or other means. They are not part of the CIF data set.        
# abcdefghijklmnopqrstuvwxyzABCDEFGHIJKLMNOPQRSTUVWXYZ0123456789              
# !@#$%^&*()_+{}:"~<>?|\-=[];'`,./ 
